# Supplementary material for: Evaluating lung cancer screening in China: Implications for eligibility criteria design from a microsimulation modeling approach
Source: PLOS journal article supplement (doi:10.1371/journal.pone.0173119), 2017-03-08

**S1 Fig. Lung cancer histology distribution calibration: model output versus calibration targets.** A) Male  
B) Female.

A)

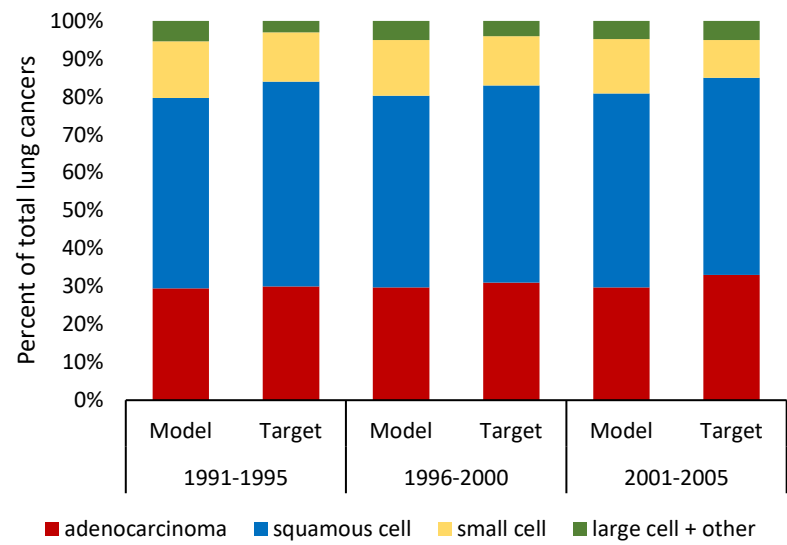

B)

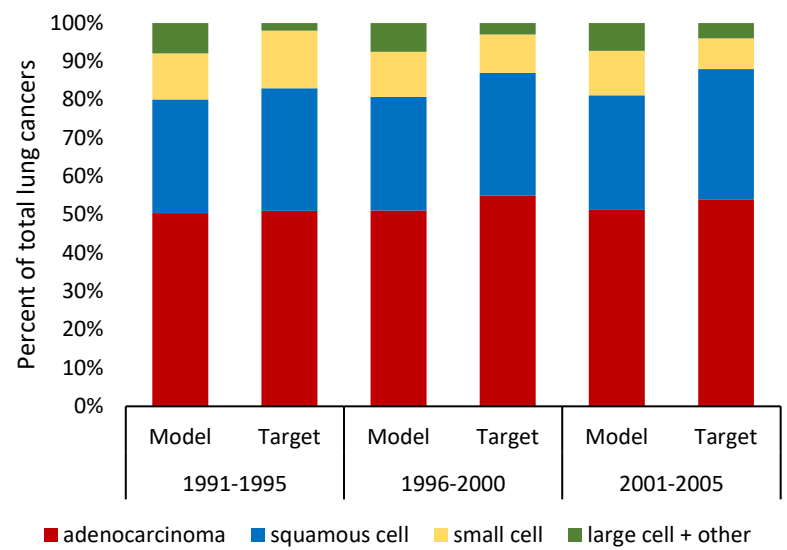

Supplement: S4 (10.1371/journal.pone.0173119.s004) [file journal.pone.0173119.s004]
